# Supplementary material
Source: PubMed Central journal article supplement (PMC5521972)
Supplement: DC170110SupplementaryData.pdf [file DC170110SupplementaryData.pdf]

SUPPLEMENTARY DATA

**Supplementary Figure S1. Study cohort creation for hemoglobin A1c analyses.**

\*ICD-9 codes for diabetes: 249.xx, 250.xx, 357.2, 362.0x, 366.41.

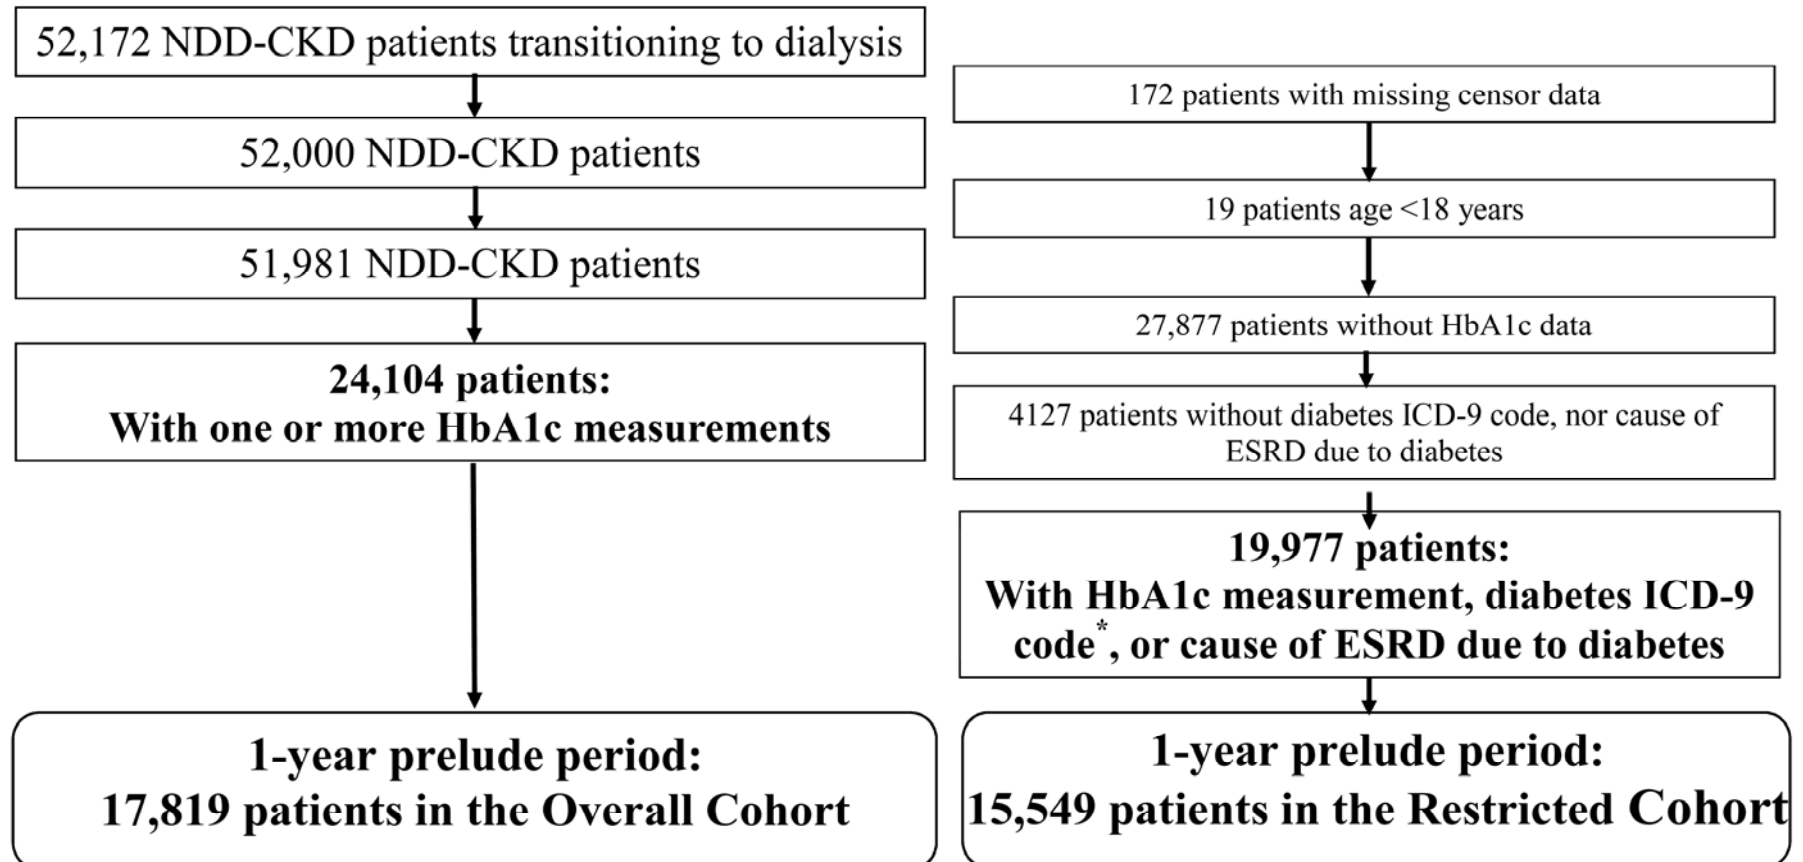

SUPPLEMENTARY DATA

**Supplementary Figure S2. Association between hemoglobin A1c over the one-year prelude period and one-year cardiovascular mortality in the Overall Cohort (Panel A) and Restricted Cohort (Panel B) using Fine and Gray competing risks regression.** Hemoglobin A1c levels of <5, 5-<6, 6-<7, 7-<8, 8-<9, and ≥9% equivalent to <31, 31-<42, 42-<53, 53-<64, 64-<75, and ≥75mmol/mol, respectively. Minimally adjusted model includes patient's calendar quarter of dialysis initiation. Case-mix model includes minimally adjusted covariates + age, sex, race, ethnicity, cause of end-stage renal disease, Charlson comorbidity index, diabetes, congestive heart failure, and cerebrovascular disease. Expanded case-mix model includes case-mix covariates as well as residential region, initial dialysis modality, and body mass index. Expanded case-mix+laboratory model includes expanded case-mix covariates + serum albumin, hemoglobin, serum bicarbonate, estimated glomerular filtration rate (eGFR) averaged over the one-year prelude period, and last eGFR level measured prior to dialysis initiation.

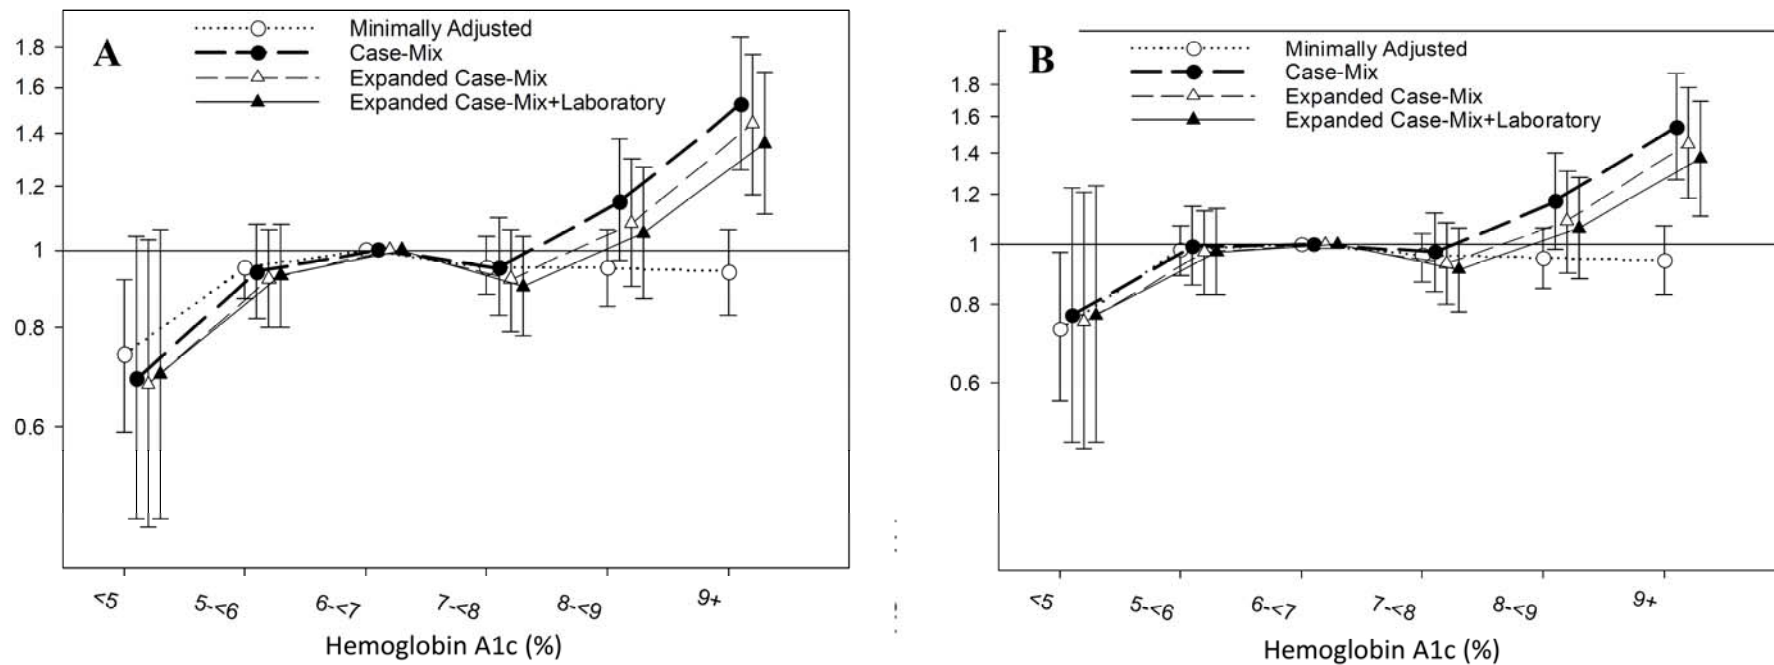

SUPPLEMENTARY DATA

**Supplementary Figure S3. Association between mean random glucose over the one-year prelude period and one-year all-cause (Panel A) and cardiovascular mortality using Fine and Gray competing risks regression (Panel B).** Minimally adjusted model includes patient's calendar quarter of dialysis initiation. Case-mix model includes minimally adjusted covariates + age, sex, race, ethnicity, cause of end-stage renal disease, Charlson comorbidity index, diabetes, congestive heart failure, and cerebrovascular disease. Expanded case-mix model includes case-mix covariates as well as residential region, initial dialysis modality, and body mass index. Expanded case-mix+laboratory model includes expanded case-mix covariates + serum albumin, hemoglobin, serum bicarbonate, estimated glomerular filtration rate (eGFR) averaged over the one-year prelude period, and last eGFR level measured prior to dialysis initiation.

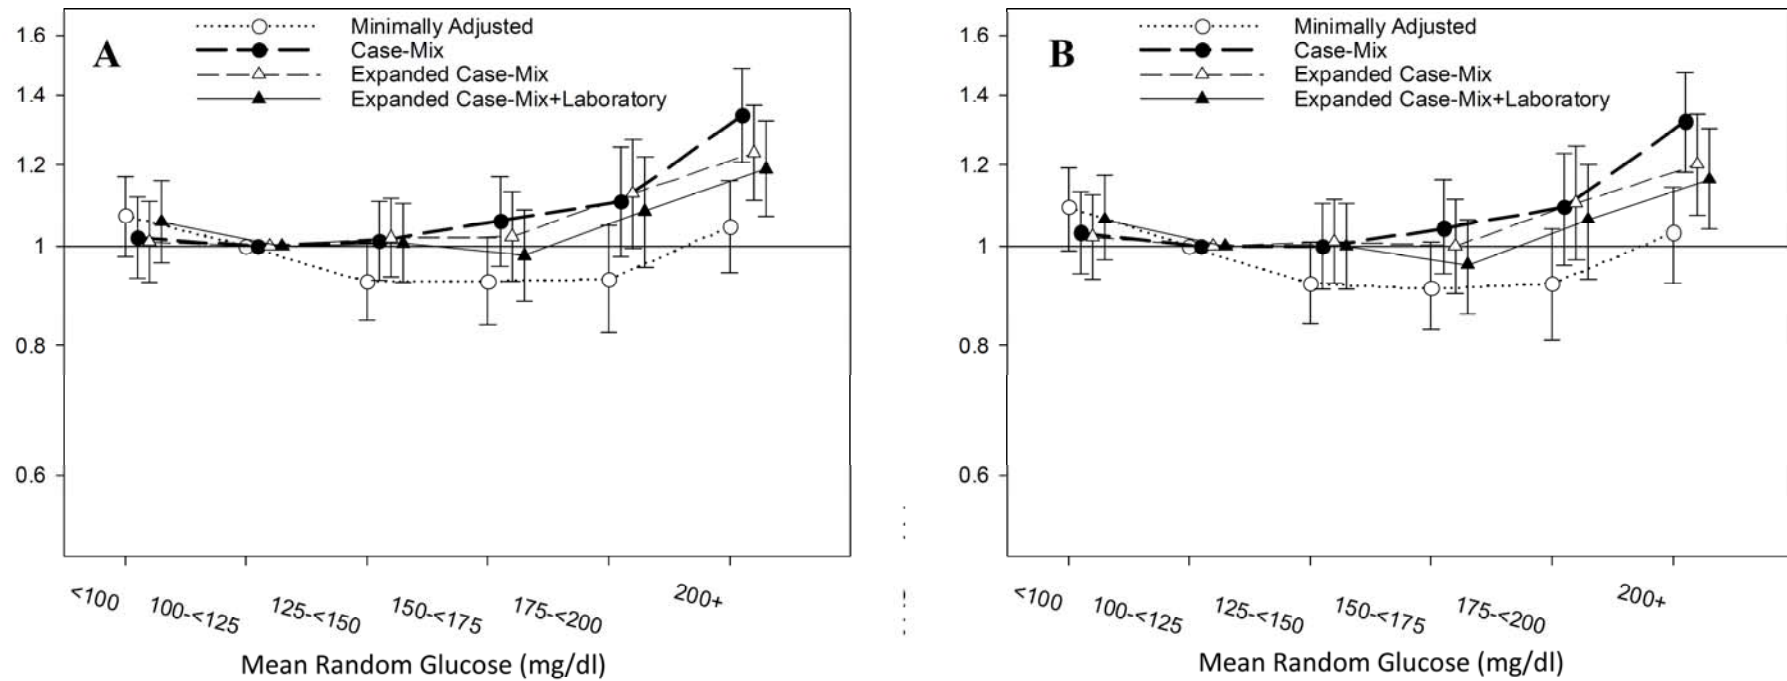

SUPPLEMENTARY DATA

**Supplementary Table 1. Association between hemoglobin A1c over the one-year prelude period and one-year all-cause mortality.**

| OVERALL COHORT (N=17,819): ALL-CAUSE MORTALITY  |                    |       |                  |        |                   |        |                              |        |
|-------------------------------------------------|--------------------|-------|------------------|--------|-------------------|--------|------------------------------|--------|
| HbA1c<br>(%)<br>[mmol/mol]                      | Minimally adjusted |       | Case-mix         |        | Expanded case-mix |        | Expanded case-mix+laboratory |        |
|                                                 | HR (95%CI)         | p     | HR (95%CI)       | p      | HR (95%CI)        | p      | HR (95%CI)                   | p      |
| <5<br>[<31]                                     | 0.72 (0.58-0.89)   | 0.002 | 0.88 (0.71-1.09) | 0.2    | 0.91 (0.74-1.14)  | 0.4    | 0.91 (0.73-1.13)             | 0.4    |
| 5-<6<br>[31-<42]                                | 0.95 (0.88-1.03)   | 0.2   | 0.99 (0.91-1.08) | 0.8    | 1.02 (0.94-1.10)  | 0.7    | 1.02 (0.94-1.11)             | 0.6    |
| 6-<7<br>[42-<53]                                | 1 (ref)            | n/a   | 1 (ref)          | n/a    | 1 (ref)           | n/a    | 1 (ref)                      | n/a    |
| 7-<8<br>[53-<64]                                | 0.96 (0.89-1.05)   | 0.4   | 1.05 (0.97-1.15) | 0.2    | 1.05 (0.96-1.14)  | 0.3    | 1.04 (0.95-1.13)             | 0.4    |
| 8-<9<br>[64-<75]                                | 0.95 (0.85-1.06)   | 0.3   | 1.19 (1.07-1.32) | 0.002  | 1.17 (1.05-1.30)  | 0.006  | 1.11 (1.00-1.24)             | 0.05   |
| ≥9<br>[≥75]                                     | 0.97 (0.86-1.09)   | 0.6   | 1.48 (1.31-1.67) | <0.001 | 1.44 (1.27-1.62)  | <0.001 | 1.32 (1.16-1.49)             | <0.001 |
| DIABETES COHORT (N=15,549): ALL-CAUSE MORTALITY |                    |       |                  |        |                   |        |                              |        |

SUPPLEMENTARY DATA

| <b>HbA1c</b><br><br>(%)<br><br>[mmol/mol] | <b>Minimally adjusted</b> |          | <b>Case-mix</b>   |          | <b>Expanded case-mix</b> |          | <b>Expanded case-mix+laboratory</b> |          |
|-------------------------------------------|---------------------------|----------|-------------------|----------|--------------------------|----------|-------------------------------------|----------|
|                                           | <b>HR (95%CI)</b>         | <b>p</b> | <b>HR (95%CI)</b> | <b>p</b> | <b>HR (95%CI)</b>        | <b>p</b> | <b>HR (95%CI)</b>                   | <b>p</b> |
| <b>&lt;5</b><br><br>[<31]                 | 0.71 (0.54-0.93)          | 0.01     | 0.82 (0.62-1.08)  | 0.2      | 0.87 (0.66-1.15)         | 0.3      | 0.89 (0.68-1.18)                    | 0.4      |
| <b>5-&lt;6</b><br><br>[31-<42]            | 0.97 (0.89-1.06)          | 0.5      | 1.01 (0.92-1.10)  | 0.9      | 1.02 (0.94-1.12)         | 0.6      | 1.03 (0.94-1.13)                    | 0.5      |
| <b>6-&lt;7</b><br><br>[42-<53]            | 1 (ref)                   | n/a      | 1 (ref)           | n/a      | 1 (ref)                  | n/a      | 1 (ref)                             | n/a      |
| <b>7-&lt;8</b><br><br>[53-<64]            | 0.96 (0.88-1.05)          | 0.4      | 1.06 (0.97-1.15)  | 0.2      | 1.05 (0.96-1.14)         | 0.3      | 1.03 (0.94-1.12)                    | 0.5      |
| <b>8-&lt;9</b><br><br>[64-<75]            | 0.95 (0.85-1.06)          | 0.3      | 1.20 (1.07-1.34)  | 0.001    | 1.17 (1.05-1.30)         | 0.006    | 1.11 (0.99-1.24)                    | 0.06     |
| <b>≥9</b><br><br>[≥75]                    | 0.97 (0.86-1.09)          | 0.6      | 1.50 (1.32-1.69)  | <0.001   | 1.44 (1.27-1.63)         | <0.001   | 1.32 (1.17-1.50)                    | <0.001   |

SUPPLEMENTARY DATA

**Supplementary Table S2. Association between hemoglobin A1c over the one-year prelude period and one-year cardiovascular mortality using Fine and Gray competing risks regression.**

| OVERALL COHORT (N=17,819): CARDIOVASCULAR MORTALITY |                    |       |                  |        |                   |        |                              |       |
|-----------------------------------------------------|--------------------|-------|------------------|--------|-------------------|--------|------------------------------|-------|
| HbA1c<br>(%)<br>[mmol/mol]                          | Minimally adjusted |       | Case-mix         |        | Expanded case-mix |        | Expanded case-mix+laboratory |       |
|                                                     | HR (95%CI)         | p     | HR (95%CI)       | p      | HR (95%CI)        | p      | HR (95%CI)                   | p     |
| <5<br>[<31]                                         | 0.74 (0.59-0.92)   | 0.007 | 0.69 (0.46-1.04) | 0.07   | 0.68 (0.45-1.03)  | 0.07   | 0.70 (0.46-1.06)             | 0.09  |
| 5-<6<br>[31-<42]                                    | 0.95 (0.87-1.03)   | 0.2   | 0.94 (0.82-1.08) | 0.4    | 0.92 (0.80-1.06)  | 0.3    | 0.93 (0.80-1.08)             | 0.3   |
| 6-<7<br>[42-<53]                                    | 1 (ref)            | n/a   | 1 (ref)          | n/a    | 1 (ref)           | n/a    | 1 (ref)                      | n/a   |
| 7-<8<br>[53-<64]                                    | 0.95 (0.88-1.04)   | 0.3   | 0.95 (0.83-1.10) | 0.5    | 0.92 (0.79-1.06)  | 0.2    | 0.90 (0.78-1.04)             | 0.2   |
| 8-<9<br>[64-<75]                                    | 0.95 (0.85-1.06)   | 0.3   | 1.15 (0.97-1.38) | 0.1    | 1.08 (0.90-1.30)  | 0.4    | 1.05 (0.87-1.27)             | 0.6   |
| ≥9<br>[≥75]                                         | 0.94 (0.83-1.06)   | 0.3   | 1.52 (1.26-1.85) | <0.001 | 1.44 (1.17-1.76)  | <0.001 | 1.36 (1.11-1.67)             | 0.004 |

SUPPLEMENTARY DATA

| DIABETES COHORT (N=15,549): CARDIOVASCULAR MORTALITY |                    |      |                  |        |                   |        |                              |       |
|------------------------------------------------------|--------------------|------|------------------|--------|-------------------|--------|------------------------------|-------|
| HbA1c<br>(%)<br>[mmol/mol]                           | Minimally adjusted |      | Case-mix         |        | Expanded case-mix |        | Expanded case-mix+laboratory |       |
|                                                      | HR (95%CI)         | p    | HR (95%CI)       | p      | HR (95%CI)        | p      | HR (95%CI)                   | p     |
| <5<br>[<31]                                          | 0.73 (0.56-0.97)   | 0.03 | 0.77 (0.48-1.23) | 0.3    | 0.75 (0.47-1.21)  | 0.2    | 0.77 (0.48-1.24)             | 0.3   |
| 5-<6<br>[31-<42]                                     | 0.98 (0.89-1.07)   | 0.7  | 0.99 (0.86-1.15) | >0.9   | 0.97 (0.83-1.13)  | 0.7    | 0.97 (0.83-1.14)             | 0.7   |
| 6-<7<br>[42-<53]                                     | 1 (ref)            | n/a  | 1 (ref)          | n/a    | 1 (ref)           | n/a    | 1 (ref)                      | n/a   |
| 7-<8<br>[53-<64]                                     | 0.96 (0.87-1.04)   | 0.3  | 0.97 (0.84-1.12) | 0.7    | 0.93 (0.80-1.08)  | 0.3    | 0.91 (0.78-1.06)             | 0.2   |
| 8-<9<br>[64-<75]                                     | 0.95 (0.85-1.06)   | 0.4  | 1.17 (0.98-1.40) | 0.08   | 1.09 (0.90-1.31)  | 0.4    | 1.06 (0.88-1.28)             | 0.6   |
| ≥9<br>[≥75]                                          | 0.94 (0.83-1.07)   | 0.4  | 1.54 (1.27-1.88) | <0.001 | 1.45 (1.18-1.78)  | <0.001 | 1.37 (1.11-1.69)             | 0.003 |

SUPPLEMENTARY DATA

**Supplementary Table S3. Subgroup analyses of the association between hemoglobin A1c over the one-year prelude period and one-year all-cause mortality.**

| AGE              | HbA1c (%)           | AGE <65 YEARS (N=7382) |                     |                     |                                | AGE ≥65 YEARS (N=10,437) |                     |                     |                                |
|------------------|---------------------|------------------------|---------------------|---------------------|--------------------------------|--------------------------|---------------------|---------------------|--------------------------------|
|                  | [mmol/mol]          | Minimally Adjusted     | Case-Mix            | Expanded Case-Mix   | Expanded Case-Mix + Laboratory | Minimally Adjusted       | Case-Mix            | Expanded Case-Mix   | Expanded Case-Mix + Laboratory |
|                  | <5<br>[<31]         | 0.94<br>(0.66-1.35)    | 0.81<br>(0.56-1.17) | 0.81<br>(0.56-1.18) | 0.70<br>(0.48-1.02)            | 0.77<br>(0.59-1.01)      | 0.86<br>(0.65-1.12) | 0.97<br>(0.74-1.28) | 1.02<br>(0.78-1.34)            |
| 5-<6<br>[31-<42] | 1.06<br>(0.89-1.25) | 1.05<br>(0.88-1.26)    | 0.99<br>(0.83-1.19) | 0.97<br>(0.81-1.16) | 0.96<br>(0.88-1.05)            | 0.98<br>(0.89-1.07)      | 1.03<br>(0.94-1.13) | 1.05<br>(0.95-1.15) |                                |
| 6-<7<br>[42-<53] | 1 (ref)             | 1 (ref)                | 1 (ref)             | 1 (ref)             | 1 (ref)                        | 1 (ref)                  | 1 (ref)             | 1 (ref)             |                                |
| 7-<8<br>[53-<64] | 1.02<br>(0.86-1.23) | 1.02<br>(0.85-1.23)    | 0.95<br>(0.79-1.14) | 0.94<br>(0.78-1.13) | 1.02<br>(0.93-1.12)            | 1.07<br>(0.97-1.18)      | 1.06<br>(0.96-1.16) | 1.05<br>(0.95-1.15) |                                |
| 8-<9<br>[64-<75] | 1.21<br>(0.99-1.47) | 1.19<br>(0.98-1.46)    | 1.09<br>(0.89-1.33) | 1.02<br>(0.83-1.25) | 1.04<br>(0.92-1.18)            | 1.19<br>(1.04-1.35)      | 1.14<br>(1.00-1.30) | 1.11<br>(0.97-1.27) |                                |
| ≥9               | 1.37                | 1.48                   | 1.32                | 1.24                | 1.21                           | 1.50                     | 1.40                | 1.28                |                                |



SUPPLEMENTARY DATA

|                | ≥75              | (1.13-1.66)               | (1.22-1.80)     | (1.08-1.60)              | (1.02-1.52)                           | (1.04-1.42)               | (1.28-1.77)     | (1.19-1.64)              | (1.09-1.52)                           |
|----------------|------------------|---------------------------|-----------------|--------------------------|---------------------------------------|---------------------------|-----------------|--------------------------|---------------------------------------|
| <b>RACE</b>    | <b>HbA1c (%)</b> | <b>WHITE (N=12,149)</b>   |                 |                          |                                       | <b>NON-WHITE (N=5385)</b> |                 |                          |                                       |
|                | [mmol/mol]       |                           |                 |                          |                                       |                           |                 |                          |                                       |
|                |                  | <b>Minimally Adjusted</b> | <b>Case-Mix</b> | <b>Expanded Case-Mix</b> | <b>Expanded Case-Mix + Laboratory</b> | <b>Minimally Adjusted</b> | <b>Case-Mix</b> | <b>Expanded Case-Mix</b> | <b>Expanded Case-Mix + Laboratory</b> |
|                | <b>&lt;5</b>     | 0.82                      | 0.98            | 1.06                     | 1.04                                  | 0.61                      | 0.64            | 0.72                     | 0.66                                  |
|                | [<31]            | (0.65-1.05)               | (0.76-1.25)     | (0.83-1.36)              | (0.82-1.34)                           | (0.39-0.96)               | (0.40-1.01)     | (0.45-1.14)              | (0.41-1.05)                           |
|                | <b>5-&lt;6</b>   | 0.93                      | 0.96            | 0.99                     | 1.00                                  | 1.09                      | 1.13            | 1.22                     | 1.17                                  |
|                | [31-<42]         | (0.86-1.02)               | (0.88-1.06)     | (0.91-1.09)              | (0.91-1.09)                           | (0.91-1.29)               | (0.94-1.36)     | (1.02-1.46)              | (0.97-1.40)                           |
|                | <b>6-&lt;7</b>   | 1 (ref)                   | 1 (ref)         | 1 (ref)                  | 1 (ref)                               | 1 (ref)                   | 1 (ref)         | 1 (ref)                  | 1 (ref)                               |
|                | [42-<53]         |                           |                 |                          |                                       |                           |                 |                          |                                       |
|                | <b>7-&lt;8</b>   | 0.96                      | 1.07            | 1.03                     | 1.02                                  | 0.95                      | 0.99            | 1.06                     | 0.97                                  |
| [53-<64]       | (0.87-1.05)      | (0.97-1.17)               | (0.93-1.13)     | (0.93-1.12)              | (0.78-1.16)                           | (0.80-1.21)               | (0.86-1.30)     | (0.79-1.19)              |                                       |
| <b>8-&lt;9</b> | 0.94             | 1.17                      | 1.11            | 1.08                     | 1.06                                  | 1.27                      | 1.27            | 1.19                     |                                       |
| [64-<75]       | (0.83-1.06)      | (1.03-1.32)               | (0.98-1.25)     | (0.95-1.22)              | (0.84-1.35)                           | (1.00-1.62)               | (1.00-1.62)     | (0.94-1.53)              |                                       |
| <b>≥9</b>      | 0.95             | 1.43                      | 1.32            | 1.25                     | 1.21                                  | 1.63                      | 1.62            | 1.38                     |                                       |
| [≥75]          | (0.83-1.09)      | (1.24-1.65)               | (1.15-1.53)     | (1.09-1.45)              | (0.96-1.53)                           | (1.28-2.08)               | (1.27-2.07)     | (1.08-1.78)              |                                       |

SUPPLEMENTARY DATA

| CHF         | HbA1c (%)   | CHF (N=11,034)     |             |                   |                                | NO CHF (N=6783)    |             |                   |                                |
|-------------|-------------|--------------------|-------------|-------------------|--------------------------------|--------------------|-------------|-------------------|--------------------------------|
|             | [mmol/mol]  |                    |             |                   |                                |                    |             |                   |                                |
|             |             | Minimally Adjusted | Case-Mix    | Expanded Case-Mix | Expanded Case-Mix + Laboratory | Minimally Adjusted | Case-Mix    | Expanded Case-Mix | Expanded Case-Mix + Laboratory |
|             | <5          | 0.70               | 0.77        | 0.89              | 0.93                           | 0.96               | 1.11        | 1.05              | 0.89                           |
|             | [<31]       | (0.53-0.92)        | (0.58-1.02) | (0.67-1.18)       | (0.69-1.23)                    | (0.69-1.33)        | (0.79-1.56) | (0.75-1.48)       | (0.63-1.26)                    |
|             | 5-<6        | 0.99               | 0.98        | 1.03              | 1.04                           | 1.02               | 1.04        | 1.05              | 1.00                           |
|             | [31-<42]    | (0.90-1.08)        | (0.89-1.08) | (0.93-1.13)       | (0.94-1.14)                    | (0.88-1.18)        | (0.89-1.21) | (0.89-1.23)       | (0.85-1.18)                    |
|             | 6-<7        | 1 (ref)            | 1 (ref)     | 1 (ref)           | 1 (ref)                        | 1 (ref)            | 1 (ref)     | 1 (ref)           | 1 (ref)                        |
|             | [42-<53]    |                    |             |                   |                                |                    |             |                   |                                |
| 7-<8        | 0.96        | 1.06               | 1.08        | 1.06              | 0.93                           | 1.03               | 0.93        | 0.94              |                                |
| [53-<64]    | (0.87-1.06) | (0.97-1.17)        | (0.98-1.18) | (0.96-1.17)       | (0.78-1.11)                    | (0.86-1.24)        | (0.78-1.12) | (0.78-1.12)       |                                |
| 8-<9        | 0.95        | 1.19               | 1.16        | 1.12              | 0.95                           | 1.19               | 1.10        | 1.06              |                                |
| [64-<75]    | (0.84-1.07) | (1.05-1.34)        | (1.02-1.31) | (0.99-1.27)       | (0.76-1.18)                    | (0.95-1.49)        | (0.88-1.38) | (0.84-1.33)       |                                |
| ≥9          | 0.96        | 1.45               | 1.36        | 1.28              | 1.05                           | 1.62               | 1.49        | 1.30              |                                |
| [≥75]       | (0.84-1.10) | (1.26-1.67)        | (1.18-1.57) | (1.11-1.47)       | (0.83-1.32)                    | (1.28-2.06)        | (1.17-1.89) | (1.02-1.67)       |                                |
| C<br>V<br>D | HbA1c (%)   | CVD (N=4181)       |             |                   |                                | NO CVD (N=13,636)  |             |                   |                                |

SUPPLEMENTARY DATA

|                                | [mmol/mol]       |                                       |                 |                          |                                       |                                    |                 |                          |                                       |
|--------------------------------|------------------|---------------------------------------|-----------------|--------------------------|---------------------------------------|------------------------------------|-----------------|--------------------------|---------------------------------------|
|                                |                  | <b>Minimally Adjusted</b>             | <b>Case-Mix</b> | <b>Expanded Case-Mix</b> | <b>Expanded Case-Mix + Laboratory</b> | <b>Minimally Adjusted</b>          | <b>Case-Mix</b> | <b>Expanded Case-Mix</b> | <b>Expanded Case-Mix + Laboratory</b> |
| <b>&lt;5</b>                   | 0.61             | 0.71                                  | 0.87            | 0.93                     | 0.77                                  | 0.93                               | 0.95            | 0.89                     |                                       |
| [<31]                          | (0.38-0.91)      | (0.44-1.14)                           | (0.54-1.41)     | (0.57-1.51)              | (0.61-0.98)                           | (0.73-1.19)                        | (0.74-1.21)     | (0.69-1.14)              |                                       |
| <b>5-&lt;6</b>                 | 1.00             | 1.00                                  | 1.02            | 1.04                     | 0.94                                  | 0.99                               | 1.03            | 1.01                     |                                       |
| [31-<42]                       | (0.87-1.15)      | (0.86-1.16)                           | (0.88-1.18)     | (0.90-1.21)              | (0.85-1.03)                           | (0.90-1.09)                        | (0.93-1.13)     | (0.91-1.11)              |                                       |
| <b>6-&lt;7</b>                 | 1 (ref)          | 1 (ref)                               | 1 (ref)         | 1 (ref)                  | 1 (ref)                               | 1 (ref)                            | 1 (ref)         | 1 (ref)                  |                                       |
| [42-<53]                       |                  |                                       |                 |                          |                                       |                                    |                 |                          |                                       |
| <b>7-&lt;8</b>                 | 1.00             | 1.10                                  | 1.13            | 1.11                     | 0.95                                  | 1.03                               | 0.99            | 0.98                     |                                       |
| [53-<64]                       | (0.86-1.16)      | (0.95-1.28)                           | (0.97-1.32)     | (0.96-1.30)              | (0.86-1.05)                           | (0.93-1.14)                        | (0.89-1.10)     | (0.88-1.09)              |                                       |
| <b>8-&lt;9</b>                 | 0.94             | 1.15                                  | 1.12            | 1.07                     | 0.96                                  | 1.20                               | 1.14            | 1.10                     |                                       |
| [64-<75]                       | (0.77-1.15)      | (0.94-1.41)                           | (0.91-1.37)     | (0.87-1.31)              | (0.85-1.09)                           | (1.05-1.36)                        | (1.00-1.30)     | (0.96-1.25)              |                                       |
| <b>≥9</b>                      | 1.03             | 1.55                                  | 1.55            | 1.42                     | 0.95                                  | 1.45                               | 1.33            | 1.24                     |                                       |
| [≥75]                          | (0.83-1.27)      | (1.24-1.94)                           | (1.24-1.94)     | (1.13-1.78)              | (0.82-1.09)                           | (1.25-1.67)                        | (1.14-1.53)     | (1.07-1.44)              |                                       |
| <b>ALBU<br/>MIN<br/>(G/DL)</b> | <b>HbA1c (%)</b> | <b>SERUM ALBUMIN &lt;3.5 (N=9467)</b> |                 |                          |                                       | <b>SERUM ALBUMIN ≥3.5 (N=8352)</b> |                 |                          |                                       |
|                                | [mmol/mol]       |                                       |                 |                          |                                       |                                    |                 |                          |                                       |

SUPPLEMENTARY DATA

|                          |                                | Minimally Adjusted               | Case-Mix            | Expanded Case-Mix        | Expanded Case-Mix + Laboratory | Minimally Adjusted             | Case-Mix            | Expanded Case-Mix        | Expanded Case-Mix + Laboratory |
|--------------------------|--------------------------------|----------------------------------|---------------------|--------------------------|--------------------------------|--------------------------------|---------------------|--------------------------|--------------------------------|
|                          | <b>&lt;5</b><br>[<31]          | 0.77<br>(0.58-1.01)              | 0.89<br>(0.67-1.18) | 1.00<br>(0.75-1.32)      | 0.93<br>(0.70-1.24)            | 0.65<br>(0.47-0.91)            | 0.85<br>(0.61-1.20) | 0.90<br>(0.64-1.26)      | 0.93<br>(0.66-1.31)            |
|                          | <b>5-&lt;6</b><br>[31-<42]     | 1.07<br>(0.96-1.19)              | 1.06<br>(0.95-1.19) | 1.07<br>(0.96-1.20)      | 1.08<br>(0.97-1.22)            | 0.83<br>(0.74-0.93)            | 0.90<br>(0.80-1.02) | 0.96<br>(0.85-1.09)      | 0.99<br>(0.87-1.11)            |
|                          | <b>6-&lt;7</b><br>[42-<53]     | 1 (ref)                          | 1 (ref)             | 1 (ref)                  | 1 (ref)                        | 1 (ref)                        | 1 (ref)             | 1 (ref)                  | 1 (ref)                        |
|                          | <b>7-&lt;8</b><br>[53-<64]     | 0.93<br>(0.83-1.04)              | 1.05<br>(0.94-1.18) | 1.11<br>(0.98-1.24)      | 1.13<br>(1.01-1.27)            | 1.00<br>(0.89-1.13)            | 1.06<br>(0.94-1.20) | 1.00<br>(0.88-1.13)      | 0.97<br>(0.86-1.10)            |
|                          | <b>8-&lt;9</b><br>[64-<75]     | 0.97<br>(0.84-1.11)              | 1.20<br>(1.04-1.38) | 1.17<br>(1.02-1.35)      | 1.14<br>(0.98-1.31)            | 0.91<br>(0.77-1.08)            | 1.16<br>(0.98-1.37) | 1.09<br>(0.92-1.29)      | 1.05<br>(0.89-1.25)            |
|                          | <b>≥9</b><br>[≥75]             | 0.98<br>(0.84-1.13)              | 1.49<br>(1.28-1.73) | 1.47<br>(1.26-1.71)      | 1.44<br>(1.24-1.68)            | 0.93<br>(0.76-1.14)            | 1.41<br>(1.14-1.73) | 1.24<br>(1.01-1.53)      | 1.15<br>(0.93-1.42)            |
| <b>HEMOGLOBIN (G/DL)</b> | <b>HbA1c (%)</b><br>[mmol/mol] | <b>HEMOGLOBIN &lt;11 (N=955)</b> |                     |                          |                                | <b>HEMOGLOBIN ≥11 (N=8264)</b> |                     |                          |                                |
|                          |                                | <b>Minimally Adjusted</b>        | <b>Case-Mix</b>     | <b>Expanded Case-Mix</b> | <b>Expanded Case-Mix +</b>     | <b>Minimally Adjusted</b>      | <b>Case-Mix</b>     | <b>Expanded Case-Mix</b> | <b>Expanded Case-Mix +</b>     |

SUPPLEMENTARY DATA

|             |                  |                                      |                 |                          |                                       |                                            |                 |                          |                                       |
|-------------|------------------|--------------------------------------|-----------------|--------------------------|---------------------------------------|--------------------------------------------|-----------------|--------------------------|---------------------------------------|
|             |                  |                                      |                 |                          | <b>Laboratory</b>                     |                                            |                 |                          | <b>Laboratory</b>                     |
|             | <b>&lt;5</b>     | 0.71                                 | 0.85            | 0.85                     | 0.87                                  | 0.81                                       | 0.98            | 1.11                     | 1.12                                  |
|             | [<31]            | (0.54-0.92)                          | (0.65-1.12)     | (0.64-1.12)              | (0.66-1.14)                           | (0.57-1.15)                                | (0.69-1.39)     | (0.78-1.59)              | (0.79-1.61)                           |
|             | <b>5-&lt;6</b>   | 1.00                                 | 1.04            | 1.04                     | 1.03                                  | 0.91                                       | 0.96            | 1.01                     | 1.04                                  |
|             | [31-<42]         | (0.90-1.11)                          | (0.93-1.16)     | (0.93-1.16)              | (0.92-1.15)                           | (0.81-1.02)                                | (0.85-1.08)     | (0.89-1.14)              | (0.92-1.17)                           |
|             | <b>6-&lt;7</b>   | 1 (ref)                              | 1 (ref)         | 1 (ref)                  | 1 (ref)                               | 1 (ref)                                    | 1 (ref)         | 1 (ref)                  | 1 (ref)                               |
|             | [42-<53]         |                                      |                 |                          |                                       |                                            |                 |                          |                                       |
|             | <b>7-&lt;8</b>   | 1.01                                 | 1.15            | 1.11                     | 1.08                                  | 0.91                                       | 0.98            | 0.97                     | 0.96                                  |
|             | [53-<64]         | (0.90-1.14)                          | (1.02-1.29)     | (0.98-1.25)              | (0.96-1.22)                           | (0.81-1.03)                                | (0.87-1.10)     | (0.86-1.09)              | (0.85-1.08)                           |
|             | <b>8-&lt;9</b>   | 1.02                                 | 1.26            | 1.20                     | 1.15                                  | 0.88                                       | 1.13            | 1.08                     | 1.04                                  |
|             | [64-<75]         | (0.88-1.19)                          | (1.08-1.47)     | (1.03-1.40)              | (0.98-1.34)                           | (0.76-1.02)                                | (0.96-1.31)     | (0.93-1.26)              | (0.89-1.21)                           |
|             | <b>≥9</b>        | 1.11                                 | 1.81            | 1.63                     | 1.49                                  | 0.84                                       | 1.24            | 1.20                     | 1.11                                  |
|             | [≥75]            | (0.94-1.31)                          | (1.52-2.15)     | (1.37-1.94)              | (1.25-1.78)                           | (0.72-1.00)                                | (1.05-1.47)     | (1.01-1.43)              | (0.93-1.32)                           |
| <b>OADs</b> | <b>HbA1c (%)</b> | <b>OAD USER<sup>b</sup> (N=6012)</b> |                 |                          |                                       | <b>OAD NON-USER<sup>b</sup> (N=11,398)</b> |                 |                          |                                       |
|             | [mmol/mol]       |                                      |                 |                          |                                       |                                            |                 |                          |                                       |
|             |                  | <b>Minimally Adjusted</b>            | <b>Case-Mix</b> | <b>Expanded Case-Mix</b> | <b>Expanded Case-Mix + Laboratory</b> | <b>Minimally Adjusted</b>                  | <b>Case-Mix</b> | <b>Expanded Case-Mix</b> | <b>Expanded Case-Mix + Laboratory</b> |

SUPPLEMENTARY DATA

|                |                                |                                          |                     |                          |                                       |                           |                                              |                          |                                       |  |
|----------------|--------------------------------|------------------------------------------|---------------------|--------------------------|---------------------------------------|---------------------------|----------------------------------------------|--------------------------|---------------------------------------|--|
|                | <b>&lt;5</b><br>[<31]          | 0.56<br>(0.33-0.98)                      | 0.72<br>(0.41-1.25) | 0.76<br>(0.44-1.32)      | 0.77<br>(0.44-1.35)                   | 0.78<br>(0.62-0.99)       | 0.93<br>(0.73-1.18)                          | 0.99<br>(0.78-1.27)      | 0.98<br>(0.77-1.26)                   |  |
|                | <b>5-&lt;6</b><br>[31-<42]     | 0.88<br>(0.77-1.02)                      | 0.96<br>(0.83-1.11) | 1.04<br>(0.90-1.20)      | 1.05<br>(0.91-1.21)                   | 1.02<br>(0.92-1.12)       | 1.03<br>(0.93-1.14)                          | 1.01<br>(0.91-1.12)      | 1.00<br>(0.90-1.10)                   |  |
|                | <b>6-&lt;7</b><br>[42-<53]     | 1 (ref)                                  | 1 (ref)             | 1 (ref)                  | 1 (ref)                               | 1 (ref)                   | 1 (ref)                                      | 1 (ref)                  | 1 (ref)                               |  |
|                | <b>7-&lt;8</b><br>[53-<64]     | 0.90<br>(0.79-1.03)                      | 0.97<br>(0.85-1.11) | 0.94<br>(0.82-1.07)      | 0.93<br>(0.81-1.06)                   | 1.00<br>(0.90-1.12)       | 1.12<br>(0.99-1.25)                          | 1.14<br>(1.02-1.28)      | 1.12<br>(1.00-1.26)                   |  |
|                | <b>8-&lt;9</b><br>[64-<75]     | 0.99<br>(0.84-1.17)                      | 1.19<br>(1.00-1.40) | 1.15<br>(0.97-1.37)      | 1.10<br>(0.92-1.31)                   | 0.92<br>(0.80-1.06)       | 1.18<br>(1.02-1.37)                          | 1.12<br>(0.97-1.29)      | 1.08<br>(0.93-1.25)                   |  |
|                | <b>≥9</b><br>[≥75]             | 0.90<br>(0.74-1.10)                      | 1.35<br>(1.10-1.66) | 1.20<br>(0.98-1.48)      | 1.14<br>(0.92-1.40)                   | 1.04<br>(0.90-1.20)       | 1.60<br>(1.37-1.87)                          | 1.57<br>(1.35-1.83)      | 1.43<br>(1.22-1.67)                   |  |
| <b>INSULIN</b> | <b>HbA1c (%)</b><br>[mmol/mol] | <b>INSULIN USER<sup>c</sup> (N=9838)</b> |                     |                          |                                       |                           | <b>INSULIN NON-USER<sup>c</sup> (N=7572)</b> |                          |                                       |  |
|                |                                | <b>Minimally Adjusted</b>                | <b>Case-Mix</b>     | <b>Expanded Case-Mix</b> | <b>Expanded Case-Mix + Laboratory</b> | <b>Minimally Adjusted</b> | <b>Case-Mix</b>                              | <b>Expanded Case-Mix</b> | <b>Expanded Case-Mix + Laboratory</b> |  |
|                | <b>&lt;5</b>                   | 0.62                                     | 0.74                | 0.77                     | 0.73                                  | 0.69                      | 0.92                                         | 1.06                     | 1.05                                  |  |

SUPPLEMENTARY DATA

|  |                |             |             |             |             |             |             |             |             |
|--|----------------|-------------|-------------|-------------|-------------|-------------|-------------|-------------|-------------|
|  | [<31]          | (0.38-1.02) | (0.45-1.22) | (0.47-1.28) | (0.44-1.21) | (0.54-0.88) | (0.72-1.18) | (0.83-1.36) | (0.81-1.35) |
|  | <b>5-&lt;6</b> | 0.99        | 1.05        | 0.99        | 0.95        | 0.88        | 0.98        | 1.07        | 1.09        |
|  | [31-<42]       | (0.86-1.14) | (0.91-1.21) | (0.86-1.14) | (0.82-1.10) | (0.80-0.97) | (0.89-1.09) | (0.97-1.19) | (0.98-1.21) |
|  | <b>6-&lt;7</b> | 1 (ref)     |
|  | [42-<53]       |             |             |             |             |             |             |             |             |
|  | <b>7-&lt;8</b> | 1.02        | 1.07        | 1.01        | 1.01        | 1.02        | 1.05        | 1.03        | 1.03        |
|  | [53-<64]       | (0.92-1.14) | (0.96-1.19) | (0.91-1.13) | (0.90-1.12) | (0.88-1.19) | (0.91-1.22) | (0.88-1.19) | (0.88-1.19) |
|  | <b>8-&lt;9</b> | 1.01        | 1.19        | 1.07        | 1.02        | 1.12        | 1.24        | 1.16        | 1.15        |
|  | [64-<75]       | (0.89-1.15) | (1.05-1.35) | (0.94-1.22) | (0.89-1.16) | (0.88-1.43) | (0.97-1.58) | (0.91-1.48) | (0.90-1.47) |
|  | <b>≥9</b>      | 1.09        | 1.54        | 1.38        | 1.28        | 0.91        | 1.35        | 0.98        | 0.94        |
|  | [≥75]          | (0.95-1.25) | (1.34-1.77) | (1.20-1.58) | (1.11-1.47) | (0.62-1.34) | (0.92-2.00) | (0.66-1.45) | (0.63-1.40) |

\*Abbreviations: CHF, congestive heart failure; CVD, cerebrovascular disease; OADs, oral anti-diabetic drugs.

†OAD user indicates receipt of an OAD prescription anytime during the prelude period, whereas OAD non-user indicates no receipt of an OAD prescription during the prelude period.

Insulin user indicates receipt of an insulin prescription anytime during the prelude period, whereas insulin non-user indicates no receipt of an insulin prescription during the prelude period.

SUPPLEMENTARY DATA

**Supplementary Table S4. Association between mean random glucose over the one-year prelude period and one-year all-cause and cardiovascular mortality using Fine and Gray competing risks regression.**

| DIABETES COHORT (N=17,121): ALL-CAUSE MORTALITY      |                    |      |                  |        |                   |        |                              |       |
|------------------------------------------------------|--------------------|------|------------------|--------|-------------------|--------|------------------------------|-------|
| Mean<br>Random<br>Glucose<br>(mg/dl)                 | Minimally adjusted |      | Case-mix         |        | Expanded case-mix |        | Expanded case-mix+laboratory |       |
|                                                      | HR (95%CI)         | p    | HR (95%CI)       | p      | HR (95%CI)        | p      | HR (95%CI)                   | p     |
| <100                                                 | 1.07 (0.98-1.17)   | 0.1  | 1.02 (0.93-1.11) | 0.7    | 1.01 (0.92-1.11)  | 0.8    | 1.05 (0.96-1.16)             | 0.3   |
| 100-<125                                             | 1 (ref)            | n/a  | 1 (ref)          | n/a    | 1 (ref)           | n/a    | 1 (ref)                      | n/a   |
| 125-<150                                             | 0.92 (0.85-1.01)   | 0.07 | 1.01 (0.93-1.10) | 0.8    | 1.02 (0.93-1.11)  | 0.7    | 1.01 (0.92-1.10)             | 0.9   |
| 150-<175                                             | 0.93 (0.84-1.02)   | 0.1  | 1.06 (0.96-1.17) | 0.3    | 1.02 (0.92-1.13)  | 0.7    | 0.98 (0.89-1.08)             | 0.7   |
| 175-<200                                             | 0.93 (0.83-1.05)   | 0.2  | 1.10 (0.98-1.25) | 0.1    | 1.12 (0.99-1.27)  | 0.06   | 1.08 (0.95-1.22)             | 0.2   |
| ≥200                                                 | 1.04 (0.94-1.16)   | 0.4  | 1.34 (1.20-1.49) | <0.001 | 1.23 (1.11-1.37)  | <0.001 | 1.19 (1.07-1.32)             | 0.002 |
| DIABETES COHORT (N=17,121): CARDIOVASCULAR MORTALITY |                    |      |                  |        |                   |        |                              |       |
| Mean<br>Random<br>Glucose<br>(mg/dl)                 | Minimally adjusted |      | Case-mix         |        | Expanded case-mix |        | Expanded case-mix+laboratory |       |
|                                                      | HR (95%CI)         | p    | HR (95%CI)       | p      | HR (95%CI)        | p      | HR (95%CI)                   | p     |



SUPPLEMENTARY DATA

|                    |                  |      |                  |        |                  |      |                  |        |
|--------------------|------------------|------|------------------|--------|------------------|------|------------------|--------|
| <b>&lt;100</b>     | 1.09 (0.99-1.19) | 0.08 | 1.03 (0.94-1.13) | 0.5    | 1.09 (0.99-1.19) | 0.08 | 1.03 (0.94-1.13) | 0.5    |
| <b>100-&lt;125</b> | 1 (ref)          | n/a  | 1 (ref)          | n/a    | 1 (ref)          | n/a  | 1 (ref)          | n/a    |
| <b>125-&lt;150</b> | 0.92 (0.84-1.01) | 0.07 | 1.00 (0.91-1.10) | >0.9   | 0.92 (0.84-1.01) | 0.07 | 1.00 (0.91-1.10) | >0.9   |
| <b>150-&lt;175</b> | 0.91 (0.83-1.01) | 0.09 | 1.04 (0.94-1.16) | 0.4    | 0.91 (0.83-1.01) | 0.09 | 1.04 (0.94-1.16) | 0.4    |
| <b>175-&lt;200</b> | 0.92 (0.81-1.04) | 0.2  | 1.09 (0.96-1.23) | 0.2    | 0.92 (0.81-1.04) | 0.2  | 1.09 (0.96-1.23) | 0.2    |
| <b>≥200</b>        | 1.03 (0.92-1.14) | 0.6  | 1.32 (1.18-1.47) | <0.001 | 1.03 (0.92-1.14) | 0.6  | 1.32 (1.18-1.47) | <0.001 |

SUPPLEMENTARY DATA

**Supplementary Table S5. Subgroup analyses of the association between mean random glucose over the one-year prelude period and one-year all-cause mortality.**

| AGE      | Mean Random Glucose | AGE <65 YEARS (N=6791) |                     |                     |                                | AGE ≥65 YEARS (N=10,330) |                     |                     |                                |
|----------|---------------------|------------------------|---------------------|---------------------|--------------------------------|--------------------------|---------------------|---------------------|--------------------------------|
|          |                     | Minimally Adjusted     | Case-Mix            | Expanded Case-Mix   | Expanded Case-Mix + Laboratory | Minimally Adjusted       | Case-Mix            | Expanded Case-Mix   | Expanded Case-Mix + Laboratory |
| <100     | 0.81<br>(0.65-1.03) | 0.88<br>(0.70-1.11)    | 0.87<br>(0.69-1.11) | 0.89<br>(0.70-1.13) | 1.08<br>(0.98-1.19)            | 1.04<br>(0.95-1.15)      | 1.03<br>(0.93-1.14) | 1.08<br>(0.98-1.19) |                                |
| 100-<125 | 1 (ref)             | 1 (ref)                | 1 (ref)             | 1 (ref)             | 1 (ref)                        | 1 (ref)                  | 1 (ref)             | 1 (ref)             |                                |
| 125-<150 | 0.90<br>(0.75-1.09) | 0.92<br>(0.76-1.11)    | 0.86<br>(0.71-1.04) | 0.85<br>(0.70-1.03) | 0.99<br>(0.89-1.09)            | 1.04<br>(0.94-1.15)      | 1.06<br>(0.96-1.17) | 1.05<br>(0.95-1.16) |                                |
| 150-<175 | 1.11<br>(0.92-1.34) | 1.09<br>(0.90-1.32)    | 1.10<br>(0.90-1.33) | 1.03<br>(0.85-1.26) | 0.99<br>(0.88-1.11)            | 1.03<br>(0.92-1.16)      | 0.97<br>(0.86-1.09) | 0.94<br>(0.83-1.05) |                                |
| 175-<200 | 1.05<br>(0.83-1.31) | 1.03<br>(0.82-1.30)    | 0.94<br>(0.74-1.19) | 0.86<br>(0.68-1.09) | 1.05<br>(0.91-1.21)            | 1.13<br>(0.98-1.30)      | 1.20<br>(1.04-1.38) | 1.17<br>(1.01-1.35) |                                |
| ≥200     | 1.27                | 1.25                   | 1.13                | 1.06                | 1.24                           | 1.35                     | 1.25                | 1.22                |                                |

SUPPLEMENTARY DATA

|             |                       | (1.05-1.53)               | (1.03-1.51)         | (0.94-1.37)              | (0.87-1.28)                           | (1.09-1.40)               | (1.19-1.53)         | (1.10-1.42)              | (1.07-1.39)                           |
|-------------|-----------------------|---------------------------|---------------------|--------------------------|---------------------------------------|---------------------------|---------------------|--------------------------|---------------------------------------|
| <b>RACE</b> | <b>Mean</b>           | <b>WHITE (N=11,977)</b>   |                     |                          |                                       | <b>NON-WHITE (N=5133)</b> |                     |                          |                                       |
|             | <b>Random Glucose</b> |                           |                     |                          |                                       |                           |                     |                          |                                       |
|             |                       | <b>Minimally Adjusted</b> | <b>Case-Mix</b>     | <b>Expanded Case-Mix</b> | <b>Expanded Case-Mix + Laboratory</b> | <b>Minimally Adjusted</b> | <b>Case-Mix</b>     | <b>Expanded Case-Mix</b> | <b>Expanded Case-Mix + Laboratory</b> |
|             | <b>&lt;100</b>        | 1.14<br>(1.03-1.26)       | 1.07<br>(0.97-1.18) | 1.05<br>(0.95-1.16)      | 1.09<br>(0.99-1.21)                   | 0.83<br>(0.67-1.02)       | 0.83<br>(0.67-1.02) | 0.87<br>(0.71-1.08)      | 0.91<br>(0.74-1.13)                   |
|             | <b>100-&lt;125</b>    | 1 (ref)                   | 1 (ref)             | 1 (ref)                  | 1 (ref)                               | 1 (ref)                   | 1 (ref)             | 1 (ref)                  | 1 (ref)                               |
|             | <b>125-&lt;150</b>    | 0.96<br>(0.87-1.06)       | 1.05<br>(0.95-1.16) | 1.06<br>(0.96-1.17)      | 1.05<br>(0.95-1.15)                   | 0.80<br>(0.66-0.97)       | 0.87<br>(0.72-1.06) | 0.84<br>(0.69-1.02)      | 0.86<br>(0.70-1.05)                   |
|             | <b>150-&lt;175</b>    | 0.90<br>(0.81-1.01)       | 1.04<br>(0.93-1.16) | 0.99<br>(0.89-1.11)      | 0.96<br>(0.86-1.08)                   | 0.98<br>(0.79-1.21)       | 1.14<br>(0.92-1.41) | 1.09<br>(0.88-1.35)      | 0.99<br>(0.80-1.24)                   |
|             | <b>175-&lt;200</b>    | 0.93<br>(0.81-1.06)       | 1.11<br>(0.97-1.27) | 1.15<br>(1.00-1.31)      | 1.11<br>(0.97-1.27)                   | 0.85<br>(0.65-1.12)       | 1.06<br>(0.80-1.40) | 0.94<br>(0.71-1.26)      | 0.90<br>(0.68-1.19)                   |
|             | <b>≥200</b>           | 1.05<br>(0.94-1.18)       | 1.36<br>(1.21-1.53) | 1.24<br>(1.10-1.40)      | 1.21<br>(1.08-1.37)                   | 0.99<br>(0.79-1.24)       | 1.20<br>(0.96-1.51) | 1.15<br>(0.91-1.44)      | 1.03<br>(0.82-1.30)                   |

SUPPLEMENTARY DATA

|     | Mean           | CHF (N=11,083)      |                     |                     |                                | NO CHF (N=6038)     |                     |                     |                                |  |
|-----|----------------|---------------------|---------------------|---------------------|--------------------------------|---------------------|---------------------|---------------------|--------------------------------|--|
|     | Random Glucose |                     |                     |                     |                                |                     |                     |                     |                                |  |
| CHF |                | Minimally Adjusted  | Case-Mix            | Expanded Case-Mix   | Expanded Case-Mix + Laboratory | Minimally Adjusted  | Case-Mix            | Expanded Case-Mix   | Expanded Case-Mix + Laboratory |  |
|     | <100           | 1.14<br>(1.03-1.26) | 1.05<br>(0.95-1.17) | 1.02<br>(0.92-1.12) | 1.06<br>(0.96-1.18)            | 0.85<br>(0.70-1.04) | 0.89<br>(0.72-1.08) | 0.91<br>(0.75-1.12) | 0.95<br>(0.78-1.17)            |  |
|     | 100-<125       | 1 (ref)             | 1 (ref)             | 1 (ref)             | 1 (ref)                        | 1 (ref)             | 1 (ref)             | 1 (ref)             | 1 (ref)                        |  |
|     | 125-<150       | 0.89<br>(0.80-0.98) | 0.98<br>(0.89-1.09) | 0.97<br>(0.87-1.07) | 0.97<br>(0.88-1.07)            | 1.04<br>(0.88-1.24) | 1.10<br>(0.92-1.31) | 1.15<br>(0.97-1.38) | 1.13<br>(0.94-1.35)            |  |
|     | 150-<175       | 0.93<br>(0.83-1.04) | 1.06<br>(0.94-1.18) | 1.00<br>(0.90-1.13) | 0.97<br>(0.87-1.09)            | 0.91<br>(0.74-1.11) | 1.06<br>(0.85-1.30) | 1.05<br>(0.85-1.30) | 0.99<br>(0.80-1.23)            |  |
|     | 175-<200       | 0.93<br>(0.81-1.06) | 1.11<br>(0.97-1.27) | 1.14<br>(0.99-1.30) | 1.12<br>(0.98-1.29)            | 0.87<br>(0.67-1.13) | 1.06<br>(0.81-1.39) | 1.06<br>(0.81-1.39) | 0.97<br>(0.74-1.27)            |  |
|     | ≥200           | 1.01<br>(0.90-1.14) | 1.28<br>(1.14-1.45) | 1.15<br>(1.02-1.30) | 1.12<br>(0.99-1.27)            | 1.18<br>(0.96-1.44) | 1.50<br>(1.22-1.85) | 1.43<br>(1.16-1.77) | 1.33<br>(1.07-1.65)            |  |
|     | CVD            | Mean                | CVD (N=4212)        |                     |                                |                     | NO CVD (N=12,909)   |                     |                                |  |
|     |                | Random              |                     |                     |                                |                     |                     |                     |                                |  |

SUPPLEMENTARY DATA

|                       | Glucose               |                                       |                     |                     |                                |                                    |                     |                     |                                |
|-----------------------|-----------------------|---------------------------------------|---------------------|---------------------|--------------------------------|------------------------------------|---------------------|---------------------|--------------------------------|
|                       |                       | Minimally Adjusted                    | Case-Mix            | Expanded Case-Mix   | Expanded Case-Mix + Laboratory | Minimally Adjusted                 | Case-Mix            | Expanded Case-Mix   | Expanded Case-Mix + Laboratory |
|                       | <100                  | 1.10<br>(0.94-1.28)                   | 1.00<br>(0.86-1.17) | 1.02<br>(0.87-1.20) | 1.05<br>(0.90-1.24)            | 1.06<br>(0.95-1.18)                | 1.02<br>(0.91-1.14) | 1.00<br>(0.89-1.12) | 1.05<br>(0.94-1.17)            |
|                       | 100-<125              | 1 (ref)                               | 1 (ref)             | 1 (ref)             | 1 (ref)                        | 1 (ref)                            | 1 (ref)             | 1 (ref)             | 1 (ref)                        |
|                       | 125-<150              | 0.91<br>(0.78-1.07)                   | 1.00<br>(0.85-1.17) | 1.02<br>(0.87-1.20) | 1.03<br>(0.87-1.21)            | 0.94<br>(0.85-1.04)                | 1.02<br>(0.92-1.13) | 1.02<br>(0.91-1.13) | 1.00<br>(0.89-1.11)            |
|                       | 150-<175              | 0.90<br>(0.75-1.08)                   | 0.98<br>(0.82-1.18) | 1.00<br>(0.83-1.20) | 0.96<br>(0.80-1.16)            | 0.95<br>(0.84-1.07)                | 1.08<br>(0.96-1.22) | 1.02<br>(0.90-1.15) | 0.97<br>(0.86-1.10)            |
|                       | 175-<200              | 0.85<br>(0.69-1.06)                   | 0.98<br>(0.78-1.22) | 1.04<br>(0.83-1.30) | 1.02<br>(0.82-1.28)            | 0.97<br>(0.84-1.12)                | 1.17<br>(1.01-1.35) | 1.16<br>(1.00-1.34) | 1.09<br>(0.94-1.26)            |
|                       | ≥200                  | 1.04<br>(0.87-1.24)                   | 1.31<br>(1.08-1.58) | 1.35<br>(1.12-1.63) | 1.31<br>(1.08-1.59)            | 1.05<br>(0.83-1.19)                | 1.35<br>(1.19-1.53) | 1.18<br>(1.04-1.34) | 1.13<br>(0.99-1.28)            |
| <b>ALBUMIN (G/DL)</b> | <b>Mean</b>           | <b>SERUM ALBUMIN &lt;3.5 (N=9234)</b> |                     |                     |                                | <b>SERUM ALBUMIN ≥3.5 (N=7887)</b> |                     |                     |                                |
|                       | <b>Random Glucose</b> |                                       |                     |                     |                                |                                    |                     |                     |                                |

SUPPLEMENTARY DATA

|                   |                     | Minimally Adjusted      | Case-Mix            | Expanded Case-Mix   | Expanded Case-Mix + Laboratory | Minimally Adjusted      | Case-Mix            | Expanded Case-Mix   | Expanded Case-Mix + Laboratory |
|-------------------|---------------------|-------------------------|---------------------|---------------------|--------------------------------|-------------------------|---------------------|---------------------|--------------------------------|
|                   | <100                | 1.01<br>(0.89-1.14)     | 0.99<br>(0.87-1.13) | 0.99<br>(0.87-1.12) | 1.03<br>(0.90-1.17)            | 1.15<br>(1.01-1.30)     | 1.06<br>(0.94-1.21) | 1.06<br>(0.93-1.20) | 1.09<br>(0.96-1.24)            |
|                   | 100-<125            | 1 (ref)                 | 1 (ref)             | 1 (ref)             | 1 (ref)                        | 1 (ref)                 | 1 (ref)             | 1 (ref)             | 1 (ref)                        |
|                   | 125-<150            | 0.91<br>(0.81-1.02)     | 1.00<br>(0.89-1.13) | 1.00<br>(0.89-1.13) | 1.01<br>(0.90-1.14)            | 0.93<br>(0.82-1.06)     | 1.02<br>(0.89-1.16) | 1.03<br>(0.91-1.18) | 1.03<br>(0.90-1.17)            |
|                   | 150-<175            | 0.92<br>(0.81-1.05)     | 1.09<br>(0.95-1.24) | 1.08<br>(0.94-1.23) | 1.03<br>(0.90-1.17)            | 0.91<br>(0.79-1.06)     | 1.00<br>(0.86-1.17) | 0.94<br>(0.81-1.10) | 0.92<br>(0.79-1.08)            |
|                   | 175-<200            | 0.94<br>(0.81-1.10)     | 1.17<br>(1.00-1.38) | 1.20<br>(1.02-1.41) | 1.18<br>(1.01-1.39)            | 0.89<br>(0.74-1.08)     | 1.00<br>(0.82-1.21) | 1.02<br>(0.84-1.24) | 0.96<br>(0.79-1.17)            |
|                   | ≥200                | 1.02<br>(0.89-1.16)     | 1.34<br>(1.17-1.54) | 1.26<br>(1.10-1.45) | 1.22<br>(1.06-1.40)            | 1.06<br>(0.90-1.25)     | 1.30<br>(1.10-1.54) | 1.18<br>(0.99-1.39) | 1.15<br>(0.97-1.36)            |
| HEMOGLOBIN (G/DL) | Mean Random Glucose | HEMOGLOBIN <11 (N=9300) |                     |                     |                                | HEMOGLOBIN ≥11 (N=7821) |                     |                     |                                |
|                   |                     | Minimally Adjusted      | Case-Mix            | Expanded Case-Mix   | Expanded Case-Mix + Laboratory | Minimally Adjusted      | Case-Mix            | Expanded Case-Mix   | Expanded Case-Mix + Laboratory |

SUPPLEMENTARY DATA

|             |                       |                                      |                     |                          |                                       |                                            |                     |                          |                                       |
|-------------|-----------------------|--------------------------------------|---------------------|--------------------------|---------------------------------------|--------------------------------------------|---------------------|--------------------------|---------------------------------------|
|             | <b>&lt;100</b>        | 1.01<br>(0.90-1.15)                  | 0.99<br>(0.88-1.13) | 0.97<br>(0.86-1.10)      | 1.03<br>(0.90-1.16)                   | 1.15<br>(1.01-1.30)                        | 1.05<br>(0.92-1.20) | 1.04<br>(0.91-1.19)      | 1.08<br>(0.94-1.23)                   |
|             | <b>100-&lt;125</b>    | 1 (ref)                              | 1 (ref)             | 1 (ref)                  | 1 (ref)                               | 1 (ref)                                    | 1 (ref)             | 1 (ref)                  | 1 (ref)                               |
|             | <b>125-&lt;150</b>    | 0.90<br>(0.80-1.01)                  | 1.00<br>(0.89-1.13) | 0.96<br>(0.85-1.08)      | 0.95<br>(0.84-1.07)                   | 0.96<br>(0.84-1.09)                        | 1.02<br>(0.90-1.17) | 1.07<br>(0.94-1.22)      | 1.07<br>(0.94-1.21)                   |
|             | <b>150-&lt;175</b>    | 0.92<br>(0.80-1.05)                  | 1.07<br>(0.93-1.23) | 1.05<br>(0.92-1.21)      | 0.99<br>(0.86-1.14)                   | 0.93<br>(0.81-1.07)                        | 1.04<br>(0.90-1.20) | 0.99<br>(0.86-1.15)      | 0.96<br>(0.83-1.11)                   |
|             | <b>175-&lt;200</b>    | 0.93<br>(0.79-1.09)                  | 1.13<br>(0.95-1.33) | 1.12<br>(0.94-1.32)      | 1.07<br>(0.90-1.27)                   | 0.94<br>(0.79-1.12)                        | 1.08<br>(0.91-1.29) | 1.13<br>(0.95-1.36)      | 1.11<br>(0.93-1.32)                   |
|             | <b>≥200</b>           | 1.14<br>(0.99-1.31)                  | 1.47<br>(1.27-1.70) | 1.30<br>(1.13-1.51)      | 1.28<br>(1.11-1.48)                   | 0.95<br>(0.82-1.10)                        | 1.20<br>(1.03-1.41) | 1.15<br>(0.98-1.34)      | 1.09<br>(0.93-1.27)                   |
| <b>OADs</b> | <b>Mean</b>           | <b>OAD USER<sup>b</sup> (N=6152)</b> |                     |                          |                                       | <b>OAD NON-USER<sup>b</sup> (N=10,514)</b> |                     |                          |                                       |
|             | <b>Random Glucose</b> |                                      |                     |                          |                                       |                                            |                     |                          |                                       |
|             |                       | <b>Minimally Adjusted</b>            | <b>Case-Mix</b>     | <b>Expanded Case-Mix</b> | <b>Expanded Case-Mix + Laboratory</b> | <b>Minimally Adjusted</b>                  | <b>Case-Mix</b>     | <b>Expanded Case-Mix</b> | <b>Expanded Case-Mix + Laboratory</b> |
|             | <b>&lt;100</b>        | 1.05                                 | 0.95                | 1.00                     | 1.06                                  | 1.08                                       | 1.03                | 0.98                     | 1.00                                  |

SUPPLEMENTARY DATA

|                |                       |                                          |                     |                          |                                       |                           |                                              |                          |                                       |  |
|----------------|-----------------------|------------------------------------------|---------------------|--------------------------|---------------------------------------|---------------------------|----------------------------------------------|--------------------------|---------------------------------------|--|
|                |                       | (0.90-1.23)                              | (0.81-1.12)         | (0.85-1.17)              | (0.90-1.25)                           | (0.97-1.21)               | (0.92-1.16)                                  | (0.87-1.09)              | (0.89-1.12)                           |  |
|                | <b>100-&lt;125</b>    | 1 (ref)                                  | 1 (ref)             | 1 (ref)                  | 1 (ref)                               | 1 (ref)                   | 1 (ref)                                      | 1 (ref)                  | 1 (ref)                               |  |
|                | <b>125-&lt;150</b>    | 0.94<br>(0.81-1.08)                      | 0.95<br>(0.82-1.09) | 0.97<br>(0.84-1.12)      | 0.96<br>(0.83-1.11)                   | 0.91<br>(0.82-1.02)       | 1.04<br>(0.92-1.16)                          | 1.04<br>(0.92-1.16)      | 1.02<br>(0.91-1.15)                   |  |
|                | <b>150-&lt;175</b>    | 1.03<br>(0.89-1.20)                      | 1.03<br>(0.88-1.20) | 0.99<br>(0.84-1.15)      | 0.95<br>(0.82-1.12)                   | 0.85<br>(0.74-0.97)       | 1.05<br>(0.92-1.20)                          | 1.08<br>(0.94-1.24)      | 1.03<br>(0.90-1.18)                   |  |
|                | <b>175-&lt;200</b>    | 1.04<br>(0.86-1.25)                      | 1.08<br>(0.89-1.30) | 1.12<br>(0.93-1.36)      | 1.09<br>(0.90-1.32)                   | 0.87<br>(0.74-1.02)       | 1.10<br>(0.94-1.30)                          | 1.12<br>(0.95-1.32)      | 1.07<br>(0.91-1.26)                   |  |
|                | <b>≥200</b>           | 1.16<br>(0.98-1.38)                      | 1.27<br>(1.07-1.52) | 1.14<br>(0.96-1.36)      | 1.10<br>(0.92-1.31)                   | 0.99<br>(0.87-1.12)       | 1.35<br>(1.17-1.55)                          | 1.26<br>(1.11-1.46)      | 1.21<br>(1.05-1.39)                   |  |
| <b>INSULIN</b> | <b>Mean</b>           | <b>INSULIN USER<sup>c</sup> (N=9938)</b> |                     |                          |                                       |                           | <b>INSULIN NON-USER<sup>c</sup> (N=6728)</b> |                          |                                       |  |
|                | <b>Random Glucose</b> |                                          |                     |                          |                                       |                           |                                              |                          |                                       |  |
|                |                       | <b>Minimally Adjusted</b>                | <b>Case-Mix</b>     | <b>Expanded Case-Mix</b> | <b>Expanded Case-Mix + Laboratory</b> | <b>Minimally Adjusted</b> | <b>Case-Mix</b>                              | <b>Expanded Case-Mix</b> | <b>Expanded Case-Mix + Laboratory</b> |  |
|                | <b>&lt;100</b>        | 0.98<br>(0.84-1.14)                      | 0.90<br>(0.77-1.05) | 0.96<br>(0.82-1.13)      | 1.00<br>(0.85-1.17)                   | 1.11<br>(0.99-1.25)       | 1.07<br>(0.96-1.20)                          | 1.03<br>(0.92-1.15)      | 1.07<br>(0.95-1.20)                   |  |



SUPPLEMENTARY DATA

|  |                    |                     |                     |                     |                     |                     |                     |                     |                     |
|--|--------------------|---------------------|---------------------|---------------------|---------------------|---------------------|---------------------|---------------------|---------------------|
|  | <b>100-&lt;125</b> | 1 (ref)             |
|  | <b>125-&lt;150</b> | 0.93<br>(0.82-1.06) | 0.93<br>(0.82-1.06) | 0.97<br>(0.85-1.10) | 0.96<br>(0.85-1.09) | 1.02<br>(0.90-1.15) | 1.06<br>(0.93-1.20) | 1.03<br>(0.91-1.17) | 1.03<br>(0.91-1.18) |
|  | <b>150-&lt;175</b> | 0.99<br>(0.87-1.13) | 1.02<br>(0.89-1.16) | 1.02<br>(0.89-1.17) | 0.96<br>(0.84-1.10) | 1.00<br>(0.85-1.19) | 1.04<br>(0.87-1.24) | 0.97<br>(0.82-1.16) | 0.99<br>(0.83-1.19) |
|  | <b>175-&lt;200</b> | 1.01<br>(0.86-1.17) | 1.07<br>(0.92-1.25) | 1.10<br>(0.95-1.29) | 1.06<br>(0.91-1.24) | 1.03<br>(0.82-1.30) | 1.08<br>(0.86-1.37) | 1.03<br>(0.81-1.30) | 0.99<br>(0.78-1.25) |
|  | <b>≥200</b>        | 1.15<br>(1.01-1.32) | 1.31<br>(1.15-1.50) | 1.20<br>(1.04-1.37) | 1.12<br>(0.98-1.28) | 1.12<br>(0.89-1.41) | 1.23<br>(0.97-1.55) | 1.07<br>(0.85-1.35) | 1.08<br>(0.85-1.36) |

\*Abbreviations: CHF, congestive heart failure; CVD, cerebrovascular disease; OADs, oral anti-diabetic drugs.

†OAD user indicates receipt of an OAD prescription anytime during the prelude period, whereas OAD non-user indicates no receipt of an OAD prescription during the prelude period.

Insulin user indicates receipt of an insulin prescription anytime during the prelude period, whereas insulin non-user indicates no receipt of an insulin prescription during the prelude period.
